# Supplementary material for: Hearing Aid Use and Audiology Services in Times of Prolonged Crisis
Source: Research Square preprint supplement (doi:10.21203/rs.3.rs-7383438/v1), 2025-08-25
Supplement: Supplementary file 1 [file f1340ff78f1c9073f0e5dfb1.docx]

**Appendix A: HIMIC-P** **(Hearing Instruments Management in Crisis) Guidelines for preparedness and hearing care during prolonged crises – Public Policy Guidelines Rationale and Comments**

| **Dimension** | **Rationale and Comments** |
| --- | --- |
| *Mitigation* | |
| *Operational guidelines for providing hearing care* | - Guidelines should include implementation of protocols for managing hearing care (professional treatment, funding, service and logistics) in cases such as: - loss of hearing aids - device malfunctioning or damage - inability to use devices (e.g., due to power outages) - Protocols should define the responsibilities and response mechanisms between care providers, health funds and government entities regarding replacement or repair of hearing aids lost or irreparably damaged in emergency conditions and continuity of audiological support for vulnerable populations during crises - To effectively implement teleaudiology services and fully realize their potential, hearing institutes and care providers should invest in both the necessary technological infrastructure (e.g. software; computers; internet connection) and targeted training for audiologists - Many hearing aids utilize mobile apps for remote care, enhancing accessibility for users. Familiarity with these apps allows for improved access to timely audiological support through teleaudiology services. - *Collaboration entities:* - Healthcare funds - Professional associations - Private and public hearing clinics - Governmental, municipal, and community-based organizations - Healthcare funds |
| *Public information* | - Authorities can elaborate the HIMIC-P guidelines to be tailored to local or national specific threats and emergencies - *Collaboration entities:* - Governmental municipal, and community-based organizations - Healthcare funds |
| *Preparedness* | |
| *Personnel Training* | - Empowering professionals to confidently use teleaudiology platforms will ensure continuity of care even during disruptions - *Collaboration entities:* - Hearing devices manufacturers - Hearing rehabilitation clinics - Academic institutions - Professional associations |
|  | - Providing hotline and support staff with effective communication strategies and skills for managing hearing devices is essential for promoting meaningful interactions with individuals who have hearing loss or use hearing aids - *Collaboration entities:* - Governmental, municipal, and community-based organizations - Healthcare funds |
| *Hearing amplification equipment* | - Although hearing assistive technologies may not be classified as directly life-saving, they play a critical role in enabling communication with caregivers, emergency responders, and rescue personnel, support that can be vital to survival and safety during a crisis - Personal amplifiers should be integrated into emergency kits; they can function as part of first aid systems and are reusable after proper disinfection - Hearing-related equipment such as personal amplifiers, assistive listening technologies, and other tools support communication for individuals with hearing impairments - *Collaboration entities:* - Municipal emergency stockpiles - National emergency stockpiles - Emergency and rescue organizations |
| *Teleaudiology Equipment* | - Appropriate infrastructure will ensure the provision of remote audiology services - *Collaboration entities:* - Public and private hearing clinics |
| *Audiological Equipment* | - Various limitations may withhold the use of teleaudiology and require on-site hearing care. Portable audiological equipment will ensure the ongoing provision of hearing evaluation and rehabilitation services during disaster or crisis - Depending on the number of evacuees, portable audiological equipment can be shared across multiple evacuation centers - *Collaboration entities:* - Municipal emergency stockpiles - National emergency stockpiles - Emergency and rescue organizations |
| *Professional resources* | - Audiologists must play a central role in shaping emergency preparedness plans at both national and local levels, as well as in the agencies responsible for emergency services. Their expertise is critical in medical teams that deliver essential care during disasters and at evacuation centers. Ensuring audiologists' active participation in emergency planning and response will significantly strengthen the availability and quality of care for individuals with hearing impairment during crises - *Collaboration entities:* - Hospitals - Clinics - Emergency teams - Rehabilitation and first-aid units for evacuees |
| *Response* | |
| *Teleaudiology and hearing rehabilitation services* | - Developing a thoughtful and strategic response for times of crisis is crucial. Operational procedures should be tailored to meet the unique characteristics and challenges posed by each situation. Thoroughly evaluation of field conditions including mobility of teams and those in need, the extent of infrastructure damage, and other critical factors enables effective action. By taking these proactive steps, hearing rehabilitation services can swiftly adapt to ensure continuity of optimal care at the point of need - *Collaboration entities:* - Public and private hearing clinics - Hospitals and clinics - Emergency teams - Rehabilitation and first-aid units for evacuees |
| *Recovery* | |
| *Integration of information and lessons learned* | - The conclusions and lessons learned aim at improving and streamlining the provision of hearing rehabilitation in future emergency situations - *Collaboration entities:* - All Public and private organization that were part of the response teams |
